# Supplementary material
Source: PubMed Central journal article supplement (PMC3289130)

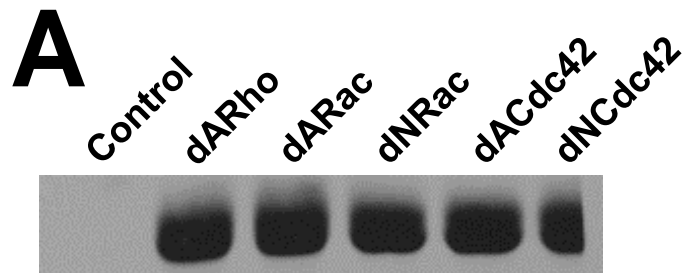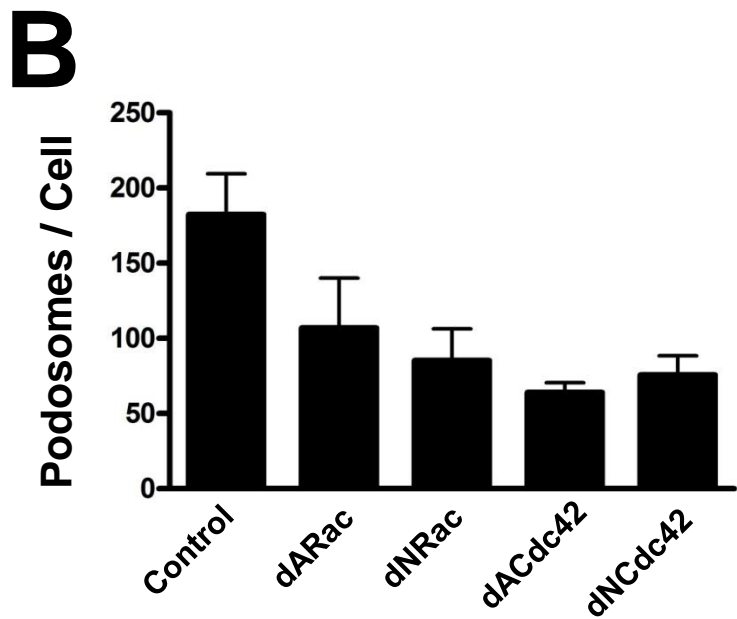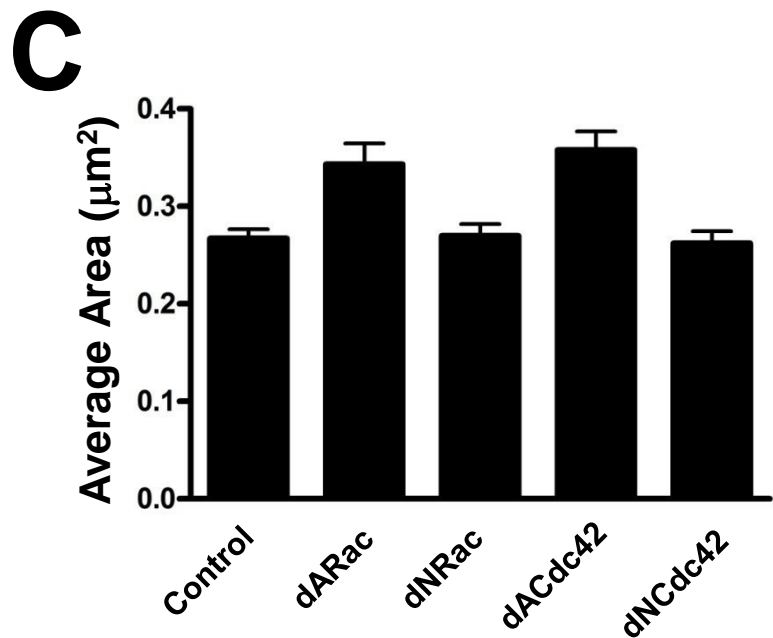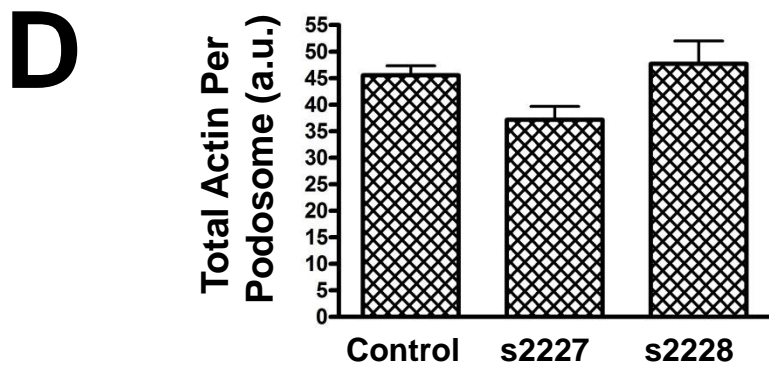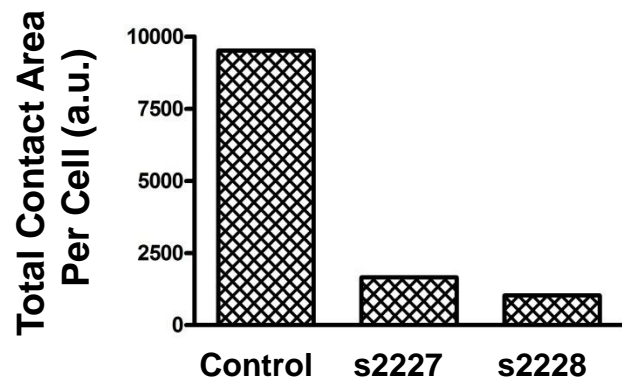

Supplement: NIHMS222185-supplement-supp_figure.pdf [file NIHMS222185-supplement-supp_figure.pdf]
